# Supplementary material for: Impact of the Choice of Cross-Validation Techniques on the Results of Machine Learning-Based Diagnostic Applications
Source: PubMed Central journal article supplement — Healthc Inform Res. 2021 Jul 31;27(3):189–99. doi: 10.4258/hir.2021.27.3.189 (PMC8369053; doi:10.4258/hir.2021.27.3.189), 2021-07-31
Supplement: hir-27-3-189-suppl.pdf [file hir-27-3-189-suppl.pdf]

**Table S1. Time domain, frequency domain, and cepstral domain features extracted using the pyAudioAnalysis library**

| Feature id | Domain           | Feature name       | Description                                                                                                                              |
|------------|------------------|--------------------|------------------------------------------------------------------------------------------------------------------------------------------|
| 1          | Time domain      | Zero crossing rate | The rate at which the sign of the signal changes during the frame.                                                                       |
| 2          |                  | Energy             | The sum of squares of the signal values normalized by its frame length.                                                                  |
| 3          |                  | Entropy of energy  | The measure of abrupt changes in the energy level of the signal.                                                                         |
| 4          | Frequency domain | Spectral centroid  | The center of gravity of the spectrum.                                                                                                   |
| 5          |                  | Spectral spread    | The second central moment of the spectrum.                                                                                               |
| 6          |                  | Spectral entropy   | Entropy of the normalized spectral energies for a set of subframes.                                                                      |
| 7          |                  | Spectral flux      | The squared difference between the normalized magnitudes of the spectra of two successive frames.                                        |
| 8          |                  | Spectral rolloff   | The frequency below which 90% of the magnitude distribution of the spectrum is concentrated.                                             |
| 9–21       | Cepstral domain  | MFCCs              | MFCCs form a cepstral representation where the frequency bands are not linear; instead, they are distributed according to the mel-scale. |
| 22–33      | Frequency domain | Chroma vector      | A 12-element representation of the spectral energy where the bins represent the 12 equal-tempered pitch classes of western-type music.   |
| 34         |                  | Chroma deviation   | The standard deviation of the 12 chroma coefficients.                                                                                    |

MFCC: Mel frequency cepstral coefficient.

Table S2. The final dataset with 138 features and a class variable

| Feature id | Feature name        | Description                                                                                                                                |
|------------|---------------------|--------------------------------------------------------------------------------------------------------------------------------------------|
| 1          | wavfile             | The name of each recording file                                                                                                            |
| 2          | healthCode          | Health ID of each subject                                                                                                                  |
| 3–36       | features_mean       | The mean of each of the 34 features, example:<br>energy_mean<br>spectral_centroid_mean                                                     |
| 37–70      | delta_features_mean | The change (delta) of the mean of each of the 34 features, example:<br>delta_energy_mean<br>delta_spectral_centroid_mean                   |
| 71–104     | features_std        | The standard deviation (std) of each of the 34 features, example:<br>energy_std<br>spectral_centroid_std                                   |
| 105–138    | delta_features_std  | The change (delta) of the standard deviation (std) of each of the 34 features, example:<br>delta_energy_std<br>delta_spectral_centroid_std |
| 139        | class               | The supervised learning class variable<br>1 for people with Parkinson's disease<br>0 for healthy controls                                  |

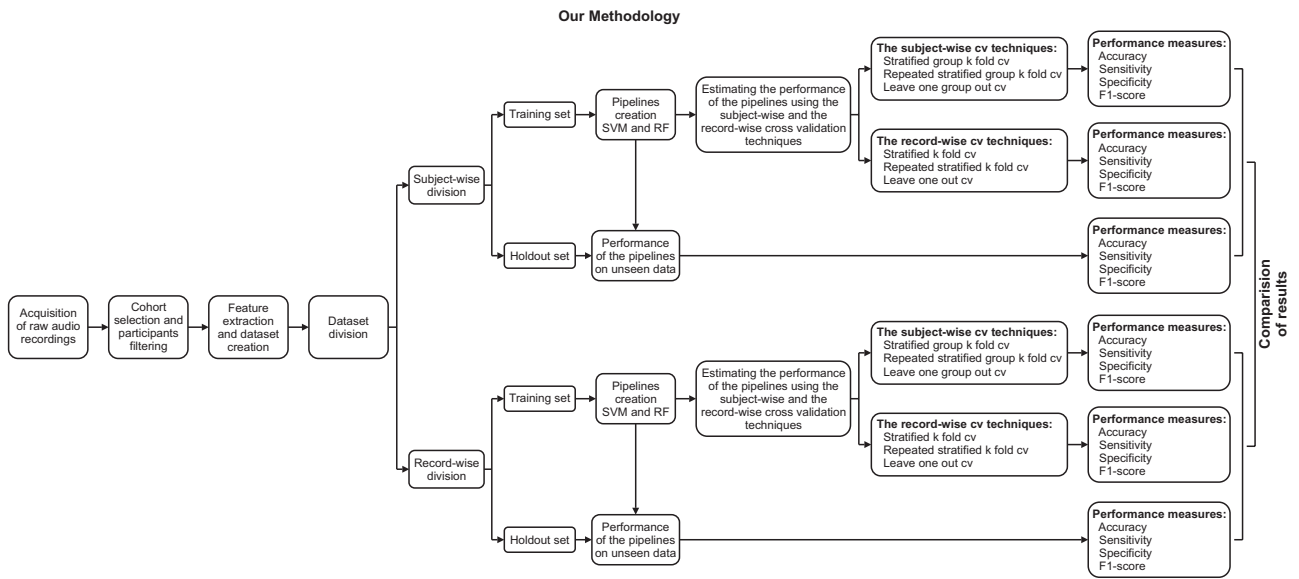

Figure S1. Schematic presentation of the methodology used in this study.
